# Supplementary material
Source: Springer Nature journal article supplement (https://www.springermedizin.de/resource/supplementary/13014_2012_705_MOESM1_ESM.pdf/9633920)

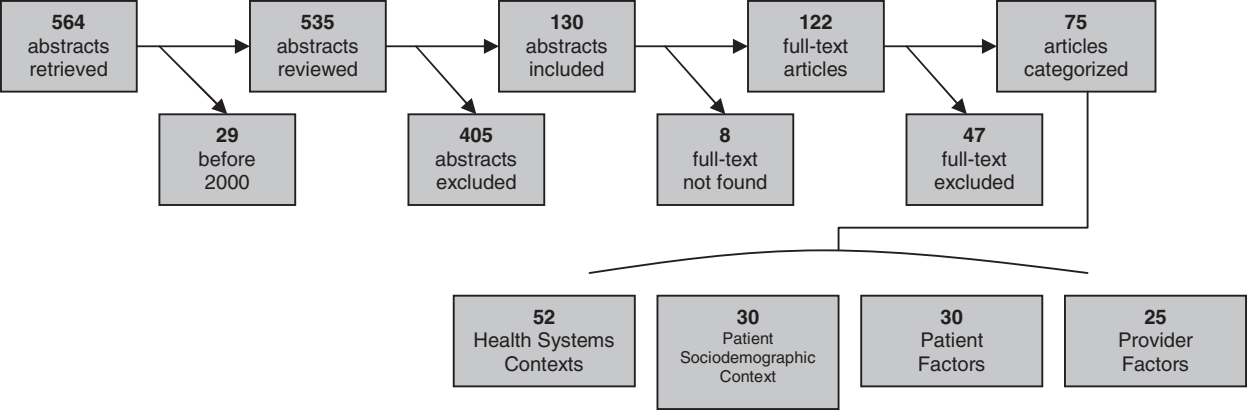

Supplement: MOESM1 [file 9633920]
